# Supplementary material for: Harmonization of resting-state functional MRI data across multiple imaging sites via the separation of site differences into sampling bias and measurement bias
Source: PLoS Biol. 2019 Apr 18;17(4):e3000042. doi: 10.1371/journal.pbio.3000042 (PMC6472734; doi:10.1371/journal.pbio.3000042)
Supplement: S1 Data — (XLSX) [file pbio.3000042.s001.xlsx]

## Sheet: Figure 2a
Mean	Participant factor	Measurement-bias	Sampling-bias (HC)	Sampling-bias (MDD)	MDD factor	Sampling-bias (SCZ)	SCZ factor	ASD factor
ID1	-0.00088652	-0.00041113	-0.00052462	-0.00034845	-0.0020542	0.0014747	-0.0011718	-0.00043067
ID2	-0.00094644	-0.00060851	-0.00071384	0.00031564		-0.00093539
ID3	0.00091405	0.00038795	-0.00061096	3.2809e-05		-0.00053933
ID4	-0.00047118	0.0053837	0.0027198
ID5	-0.0017888	0.00099132	4.0508e-05
ID6	-1.0496e-05	-0.0017726	-0.00091084
ID7	0.0016579	-0.00064273
ID8	-0.00065412	-0.00041678
ID9	0.0021856	0.0001773
ID10		-0.0002626
ID11		-0.0020657
ID12		-0.00076023
Standard deviation	Participant factor	Measurement-bias	Sampling-bias (HC)	Sampling-bias (MDD)	MDD factor	Sampling-bias (SCZ)	SCZ factor	ASD factor
ID1	0.079226	0.034272	0.026125	0.021663	0.032842	0.022563	0.037705	0.029684
ID2	0.066985	0.031192	0.02774	0.021403		0.020485
ID3	0.069639	0.042737	0.034068	0.021269		0.022012
ID4	0.06478	0.040654	0.027793
ID5	0.07369	0.053061	0.022399
ID6	0.056705	0.04336	0.021878
ID7	0.066921	0.042616
ID8	0.055266	0.037123
ID9	0.062179	0.038379
ID10		0.039611
ID11		0.043875
ID12		0.046259
Cube root of the third moment	Participant factor	Measurement-bias	Sampling-bias (HC)	Sampling-bias (MDD)	MDD factor	Sampling-bias (SCZ)	SCZ factor	ASD factor
ID1	0.041616	0.01488	-0.005819	-0.0090251	-0.014087	-0.0050378	-0.01866	0.0085482
ID2	-0.042487	0.007472	-0.010103	0.0064576		-0.0080286
ID3	-0.015202	0.029374	-0.015757	0.0081971		0.010479
ID4	0.029121	0.030633	0.013162
ID5	0.036874	-0.013443	0.0062252
ID6	0.022583	-0.027373	-0.0066259
ID7	0.035682	0.031841
ID8	0.0071276	0.025609
ID9	0.03579	0.019843
ID10		0.016633
ID11		-0.016097
ID12		-0.042559

## Sheet: Figure 2c
Contribution size	Participant factor	Measurement-bias	Sampling-bias (HC)	Sampling-bias (MDD)	MDD factor	Sampling-bias (SCZ)	SCZ factor	ASD factor
	0.010954	0.010049	0.0047789	0.001314	0.00751	0.00081725	0.0055901	0.004934

## Sheet: Figure 3
ROI ID	Participant factor	Measurement-bias	Sampling-bias (HC)	Sampling-bias (MDD)	MDD factor	Sampling-bias (SCZ)	SCZ factor	ASD factor
ROI 1	-0.39505	2.9886	-0.13942	-0.52612	1.4434	0.11848	-0.73027	-1.0024
ROI 2	1.1584	-0.55168	-0.18028	-0.93658	0.32569	0.47292	-0.46513	-0.35941
ROI 3	1.0095	0.74452	-0.40997	-0.46978	1.1281	0.055608	0.36493	0.13235
ROI 4	-0.88217	0.82365	0.23177	-0.4478	0.42155	-0.16462	-0.75588	-1.2413
ROI 5	0.36524	0.56266	0.84615	0.65317	-0.80369	-0.092933	0.62391	0.50611
ROI 6	-0.17802	0.52402	0.82097	1.6702	0.23664	-0.77867	-0.90872	-1.5334
ROI 7	-0.9911	1.1702	-1.1336	1.3218	0.66486	-0.86883	-0.46806	-0.13043
ROI 8	-0.018845	1.0245	-0.1259	-0.26617	0.51581	-0.082747	0.95192	-0.3558
ROI 9	0.25253	0.42788	0.88172	0.83189	-0.21736	0.39234	1.1899	1.192
ROI 10	-1.051	0.97182	-1.5052	2.8569	1.5442	-0.80145	-0.76713	0.50418
ROI 11	-1.632	-0.48725	-0.73658	0.95226	1.6993	0.2249	-0.94846	0.12677
ROI 12	-0.60979	0.13204	-0.80625	-0.99374	1.1355	-0.63271	-0.29308	0.72941
ROI 13	2.7703	-0.20017	0.022328	1.1302	-0.24042	0.26087	1.233	1.6887
ROI 14	0.47566	0.12299	-0.44849	1.6177	1.5553	-0.92948	-0.52124	-0.60145
ROI 15	0.84691	1.5639	0.60903	0.2176	0.59345	1.8106	0.44665	1.0029
ROI 16	0.085601	1.354	0.2083	0.61916	-0.63096	-1.5526	1.464	-0.1847
ROI 17	0.20628	1.5716	1.6788	1.7537	1.5105	1.0267	0.34878	2.3886
ROI 18	0.73864	0.33843	0.97969	-0.94522	0.36164	0.60328	0.84628	1.5764
ROI 19	-0.55106	-0.62158	0.07484	-0.56227	0.1743	-0.82621	-0.68213	0.65941
ROI 20	0.13302	0.90879	-0.80846	2.0161	0.72431	1.3285	-0.46466	2.4327
ROI 21	-0.39517	1.4243	-0.11247	0.10181	-0.31814	-0.6799	0.64905	-0.37667
ROI 22	-1.7634	0.29901	-1.9788	-1.1365	-0.11001	-0.57705	-1.2356	-0.25459
ROI 23	-0.11371	2.0502	-0.94992	0.79809	0.48155	-1.074	-0.8751	-0.82561
ROI 24	1.734	-0.35408	-0.43028	-1.4295	1.1003	-0.45632	-0.55494	0.2479
ROI 25	-1.7191	-1.1131	-2.1818	-1.2669	-2.4298	-1.1234	-1.8881	-1.7929
ROI 26	-1.1421	-1.1511	-0.83103	-0.88187	-0.50205	1.1959	0.72888	1.6041
ROI 27	-1.0873	-0.7351	0.19751	-1.4764	-1.7105	0.95196	1.2047	1.175
ROI 28	-1.9533	0.46819	-1.863	-0.37109	-0.94606	0.39766	-0.75216	0.72778
ROI 29	-1.9903	-1.2434	-0.46873	0.19789	-1.9256	2.2899	0.83736	0.25819
ROI 30	-1.6028	1.8027	0.030311	-0.45017	-0.30668	0.27074	0.080368	0.76328
ROI 31	-0.79428	0.29928	-2.1425	1.0505	-0.95164	-0.30666	1.531	0.29644
ROI 32	-0.43696	0.39843	-0.38722	0.35939	0.23752	0.87669	1.7494	1.3755
ROI 33	-0.24595	0.0043696	0.76633	1.6442	-0.24127	2.9051	4.0016	3.09
ROI 34	-1.6208	-1.1478	0.079497	0.92389	-0.38418	-0.4189	-1.0912	-0.5159
ROI 35	2.7258	-0.58687	-0.60385	-1.1437	3.2251	-1.5049	-0.86731	0.35985
ROI 36	-1.6496	2.2277	-0.73276	-0.75586	-0.99896	-0.63421	-0.73125	-0.85995
ROI 37	-2.5303	-1.321	-0.89178	1.205	-0.36007	0.029344	-1.094	-0.83092
ROI 38	-0.57335	2.3692	0.13424	0.77312	-1.0877	-0.14738	1.1263	-0.2459
ROI 39	-1.5165	0.26737	-0.070612	0.58459	-1.1828	-0.98972	-1.168	-2.0358
ROI 40	-1.0287	0.68333	-0.49667	1.4006	-1.2635	-0.038991	-0.93417	-1.398
ROI 41	-1.3105	1.6978	-0.15301	-0.6469	-0.97778	-0.25105	-1.0014	-1.4828
ROI 42	-1.2002	1.1447	0.25205	-0.12303	-0.32408	-0.22785	-1.0656	-0.94854
ROI 43	-1.3698	1.5037	-0.76926	-0.55884	0.28836	0.40196	-1.1887	-0.77948
ROI 44	-0.0062194	-0.21867	1.2594	0.32675	-0.76254	-0.68724	0.77017	0.19542
ROI 45	-0.44409	2.5176	-0.2397	-0.54148	1.2372	0.40152	-0.71904	-0.62869
ROI 46	0.83965	-0.50189	0.71135	-0.14334	-0.36688	0.034414	0.4702	0.58144
ROI 47	1.2784	-0.93747	-0.13408	-0.81673	-0.89089	0.5501	0.05017	-0.045732
ROI 48	0.25501	1.5213	1.3873	1.7893	1.5808	-0.21638	-0.37072	-0.092241
ROI 49	0.25905	-1.202	-1.238	-1.125	2.7119	-0.66375	-0.42559	-0.20832
ROI 50	-0.30516	-0.68365	-1.0138	1.4074	0.67185	-0.9448	-0.84159	-0.12743
ROI 51	0.56948	-1.5382	-0.22706	-0.45461	0.038966	0.66079	0.26306	0.19076
ROI 52	1.4068	-0.76023	-0.44239	-1.5716	1.8678	-0.77362	-0.11303	0.19296
ROI 53	2.7667	-0.46866	-0.3433	-0.59985	2.5241	-0.34126	-0.69805	-0.17427
ROI 54	1.3231	-1.074	-0.22428	0.24508	0.071968	-0.25273	-0.33313	0.040651
ROI 55	1.5551	-0.32313	1.0405	-0.7554	-0.020772	-0.46018	-0.30999	0.64581
ROI 56	1.3456	-0.74203	0.3093	0.36201	-0.4316	-0.69091	1.2056	0.83082
ROI 57	0.7671	-0.40157	-1.1762	1.7016	-0.45992	1.822	2.2003	1.706
ROI 58	0.2302	-0.93328	0.24859	0.058582	-0.49475	2.3583	1.2792	0.45715
ROI 59	-0.1294	-0.47312	-0.060465	-0.31446	0.71137	-0.20774	-0.025826	-0.25904
ROI 60	-0.2571	0.68034	0.18724	-0.52005	0.32785	-0.71591	-0.55962	-0.18108
ROI 61	-0.7338	0.16156	-0.57907	0.18438	-1.0533	-0.57451	0.0087136	-0.56363
ROI 62	1.9194	-1.0404	-0.74309	0.67321	2.8126	-0.6352	-0.219	0.99383
ROI 63	0.34353	-1.1191	0.17008	-0.72048	-1.2754	0.59455	-0.29026	-0.22466
ROI 64	0.75813	-1.0559	0.48031	-0.46439	-0.43754	-0.82146	-0.59275	-0.17017
ROI 65	1.1085	-1.1625	-0.24553	0.090346	-1.384	-1.1962	0.064233	-1.8451
ROI 66	0.56813	-0.19761	-0.34626	-0.62601	-0.41389	-0.30306	0.53118	1.8099
ROI 67	-0.28192	-1.1676	-0.39753	-1.38	-1.1608	-1.3598	-0.30989	1.5531
ROI 68	1.642	-0.50773	-0.2229	0.32616	0.41763	0.089945	-0.13439	-0.81222
ROI 69	0.57018	-0.6175	-0.27812	0.35168	0.035466	0.10512	1.1734	0.52888
ROI 70	0.95209	-0.723	-0.817	-1.2098	0.23071	-0.73878	0.08835	0.11266
ROI 71	0.10901	-0.57963	0.28208	0.0049802	2.1163	0.28124	-0.82314	-0.95495
ROI 72	0.74821	-0.74403	1.0309	-0.41146	0.33898	0.098336	0.17844	1.1103
ROI 73	1.6033	-1.4309	-0.88628	-0.56402	-0.62729	-0.17789	0.74077	0.9554
ROI 74	1.474	0.40904	-0.0085807	-0.41576	0.51645	-0.75792	-0.2025	-0.46601
ROI 75	-0.23762	-0.64432	-0.54001	-1.2677	0.45991	-0.094697	-1.0478	-1.1535
ROI 76	0.4778	-0.69481	-0.19291	-0.6897	0.24588	0.44457	1.2542	2.3753
ROI 77	0.37965	-0.49876	1.2101	-0.64542	1.2567	-0.45682	0.1863	0.30938
ROI 78	0.45954	-0.7025	0.082728	-0.74779	0.66364	0.48325	0.072277	0.7711
ROI 79	-0.18137	1.4579	-0.54283	0.40863	1.1855	-0.63618	-0.88581	-0.53495
ROI 80	-0.27321	-0.3181	0.12259	0.90529	0.29416	-1.0723	0.073357	-0.093272
ROI 81	1.0097	-0.11954	-0.23557	0.12841	-1.3245	0.99448	1.5934	1.4369
ROI 82	0.98283	0.16905	0.019567	0.69402	-0.53104	-0.35402	0.5839	1.0398
ROI 83	0.046604	-0.49851	-1.0907	-0.18436	0.19438	-0.29769	0.64884	1.1798
ROI 84	0.2973	-0.60912	0.96188	-0.73914	-0.87052	0.2225	1.8041	1.3429
ROI 85	1.2836	0.35699	0.81449	-0.30622	-0.99821	-1.4219	0.091293	1.0638
ROI 86	-0.54452	-1.0275	1.5343	-1.7827	-1.4252	-0.58698	-0.35886	-1.2039
ROI 87	0.2182	-0.71847	-0.48948	0.5096	-0.45127	-0.92198	-0.18348	-1.1966
ROI 88	-0.23848	-1.5993	-0.46159	-1.2619	0.53236	-0.17508	-1.142	0.20212
ROI 89	0.49461	0.026446	1.0222	1.675	-0.30765	0.33627	-0.27808	-0.4608
ROI 90	-0.88043	1.0794	0.62828	-0.69111	0.70405	0.26643	-0.26079	-1.0059
ROI 91	-0.099843	-0.40112	-0.66796	-0.44	-0.71324	0.43611	0.56592	0.61779
ROI 92	0.43606	-0.22967	0.95369	0.0082263	0.9756	-0.05144	1.1894	1.3302
ROI 93	1.6435	-0.32343	2.2695	0.41901	-1.2171	-1.0382	0.28308	0.5847
ROI 94	1.4713	-0.69706	0.34913	-0.19077	-1.6247	1.1075	-0.34589	-0.24473
ROI 95	0.98788	-0.80493	-0.49005	0.071474	0.16442	-0.17702	-0.044174	1.719
ROI 96	-1.0061	1.7154	-0.40359	0.081041	-1.0804	-0.082007	-1.0437	-1.15
ROI 97	-0.37103	0.97297	-0.12054	1.581	-0.17755	0.61766	-0.44564	-0.80261
ROI 98	0.010038	0.85876	-0.18708	0.83054	-0.36586	0.83822	0.3801	-0.43749
ROI 99	0.59895	0.45981	2.4437	0.4662	-1.0387	2.7894	2.1466	0.91301
ROI 100	-1.8925	0.47305	-1.8161	-0.60293	-0.7061	-0.22487	-1.2409	-0.60385
ROI 101	0.65678	-0.40742	-1.084	0.07265	2.0627	-0.44681	0.46912	-0.42486
ROI 102	0.45491	0.25556	1.2425	1.0738	0.43458	-0.93205	0.37961	-0.71189
ROI 103	0.57676	-0.63775	0.98716	-0.071672	1.1195	3.6867	2.8561	0.71236
ROI 104	1.744	-1.1252	-0.2842	0.35339	-0.099025	4.5314	-0.12119	0.38856
ROI 105	0.51272	1.1199	0.12637	1.2915	0.63991	-1.2195	-0.74408	0.038169
ROI 106	-0.76036	2.6738	-0.031679	-0.16679	-2.0534	-0.59752	-1.2276	-1.6136
ROI 107	-1.1589	1.9723	-1.3192	1.0993	-1.9763	-0.60516	-1.5409	-1.2076
ROI 108	-0.92114	1.2211	-1.7219	0.8056	-0.24749	-0.89456	-1.2984	-1.3698
ROI 109	0.59085	-0.19247	0.40925	-0.65175	1.3156	1.7736	3.0814	1.3371
ROI 110	-0.5154	-0.078972	-1.2824	0.3527	-1.0256	0.61309	-0.27064	-0.1921
ROI 111	0.74696	-0.30634	0.046515	0.43042	-0.88285	-0.35847	-0.28505	-1.4703
ROI 112	-1.433	1.8692	-0.172	-0.028083	1.1755	-0.061792	-1.3378	-1.5583
ROI 113	0.45401	-1.007	1.0432	-0.23032	-1.3538	-0.12114	0.40271	0.25131
ROI 114	0.56546	-0.69281	0.66824	0.88482	1.6173	0.36318	1.1274	0.54397
ROI 115	-0.56385	1.4462	0.045721	0.48154	1.0098	0.030631	-0.17718	-0.5131
ROI 116	-1.7065	1.3591	-0.25024	-0.64619	-0.50308	0.59363	-1.5851	-0.96922
ROI 117	0.43879	-0.37828	0.75612	0.36957	-0.21205	0.12995	-1.2403	-0.77981
ROI 118	-0.15933	-1.0878	2.115	-0.94455	0.61584	0.58696	-1.0755	0.34394
ROI 119	-0.49974	-0.18888	0.20279	-2.02	2.0578	-0.10523	-0.10725	0.61958
ROI 120	1.2834	-0.649	0.13157	-0.010481	2.91	1.0153	0.88114	0.37301
ROI 121	0.30877	-1.0074	0.019415	-0.43703	-0.028144	1.9038	1.3409	0.52084
ROI 122	0.84695	-0.076158	1.3382	0.07394	2.2078	1.0496	0.77885	1.0419
ROI 123	0.9624	-0.85547	0.28568	-0.73209	-1.3566	1.2992	0.68175	-0.25959
ROI 124	0.80528	-0.42389	-0.1699	-0.44341	-0.81276	-0.31188	0.20585	-1.2619
ROI 125	-0.068656	-1.2022	0.95822	-0.40979	-0.00091249	0.30915	-0.030913	-0.54533
ROI 126	-0.61583	-1.1952	-0.19944	-1.0945	0.25317	-1.3444	-0.71859	-1.3233
ROI 127	-1.0059	-1.2787	-0.12542	-0.68734	0.17275	-0.10951	-0.65451	1.5091
ROI 128	-0.91198	-1.2937	-1.3958	-0.37011	-1.4517	-0.45182	-0.35332	-1.0841
ROI 129	-0.90284	-0.38942	-0.69517	-1.6426	-0.18479	-0.9992	-1.2606	-0.66958
ROI 130	0.019066	-1.5554	-0.01687	-0.35365	0.23836	-1.0068	-0.43425	-0.88719
ROI 131	0.63398	-1.1326	0.15757	0.2815	1.5498	0.25947	0.13934	-0.39958
ROI 132	-1.4199	-0.74581	-1.8164	-1.5078	-2.1098	-0.65079	-1.5344	-2.1281
ROI 133	0.77815	-0.069955	0.42341	-0.88635	0.50774	-0.88728	0.44847	-0.32909
ROI 134	0.40646	-0.68278	-0.23625	0.2317	-1.5325	1.6842	0.095772	0.32495
ROI 135	1.132	-0.70307	-1.1227	0.12371	0.77255	-1.4527	-0.47958	-1.0848
ROI 136	0.61016	0.0039299	-0.3202	0.24795	-0.38663	-0.13872	-0.27477	0.055238
ROI 137	0.4712	-0.82198	-0.33376	-0.84892	-0.6003	0.47307	0.46918	0.55492
ROI 138	-0.14811	0.57633	0.20091	-0.70791	0.6416	-0.18523	1.0442	0.045287
ROI 139	0.76147	-0.37486	1.4232	0.29626	0.14064	-0.19693	0.36676	0.22594
ROI 140	-0.311	-0.69797	1.3347	-0.92635	-0.34871	0.92203	0.028464	0.33744
ROI 141	0.70036	-0.69857	2.9339	-0.36585	0.18527	-0.53199	0.25305	-0.34361
ROI 142	0.39339	-0.80018	1.8932	1.1693	1.1465	-1.0818	0.013205	-0.45686
ROI 143	-1.22	0.41176	-0.36047	-1.3479	-0.34923	0.0095395	-1.0025	-0.83717
ROI 144	-1.0894	0.3946	-0.49187	-0.11682	-0.96515	-1.2416	-0.4696	-0.95335
ROI 145	-1.0816	0.46083	-1.0434	-1.5532	0.7405	-1.0438	-0.88696	-0.77925
ROI 146	0.84509	-0.65809	-0.55767	-0.60943	-1.0217	-1.0555	0.3643	1.8656
ROI 147	-1.7614	-0.83476	-2.0264	-0.62587	-0.50085	-1.5491	-1.5566	-1.2883
ROI 148	-0.80251	0.25298	-0.30149	0.64885	-0.82642	-0.27234	-0.31745	-0.95744
ROI 149	-1.1537	-0.58071	-1.6376	-1.3201	0.33663	-0.69468	-0.97914	-1.499
ROI 150	-1.2967	0.26632	-0.5575	1.1818	2.1426	-0.2966	-0.13162	-0.85657
ROI 151	-1.077	2.031	-0.28197	-1.3211	1.1694	0.391	-1.3547	-1.0221
ROI 152	-0.85997	1.6747	-0.39176	0.086829	0.11414	0.37533	-0.92882	-0.69773
ROI 153	0.054148	1.6937	0.623	0.019744	0.30606	-0.077717	1.2488	0.031904
ROI 154	-0.46584	1.3539	-0.58446	-0.73631	0.20655	-1.5197	0.19591	-0.73859
ROI 155	0.33889	1.3074	1.1329	1.9143	0.80066	0.10614	0.38148	1.6605
ROI 156	-0.72561	0.49994	-0.9096	-0.90401	0.83283	0.26468	-0.69017	-0.67328
ROI 157	1.3578	-0.69202	1.4401	0.2265	-0.78641	-0.17472	1.3643	1.0514
ROI 158	0.30522	1.8887	0.33446	1.3966	-0.41505	-0.43794	1.7758	-0.38545
ROI 159	1.0562	0.88946	-0.32632	0.65054	-0.088983	-0.69927	0.66201	0.093091
ROI 160	1.4575	0.9928	0.25689	0.3329	0.51615	1.2152	-0.30746	1.8585
ROI 161	-1.5065	-0.11267	-2.0043	-0.31241	0.61719	-0.23222	-0.85511	-0.3008
ROI 162	-0.36523	0.6736	-0.47415	0.52805	0.10485	0.04315	-0.51771	-1.3012
ROI 163	-0.34501	1.702	-0.65954	0.47283	0.20012	-0.14215	-1.3474	-0.62948
ROI 164	0.33987	1.799	0.12198	5.6685	1.2838	-0.38975	0.34623	2.484
ROI 165	1.8655	1.0543	1.178	0.92488	0.31614	2.0242	0.5156	2.4006
ROI 166	0.064186	0.15305	0.61017	1.6543	-0.6378	-0.21497	0.23677	-0.058081
ROI 167	-1.5645	0.91779	-0.95359	-0.64172	0.17827	-1.0188	-1.162	-0.56657
ROI 168	0.80803	-0.78149	-0.5873	-1.2902	0.55927	-0.32468	-0.65664	-0.036904
ROI 169	-0.51663	-0.13587	-0.33412	0.11394	0.68339	-0.24604	-0.61396	0.23047
ROI 170	-0.4911	0.58676	1.7051	1.1317	-1.0623	-0.17315	-0.94773	-1.207
ROI 171	-1.4342	1.4368	-0.7653	-0.062047	0.92117	-1.7223	-0.88357	-0.11345
ROI 172	1.3733	0.94684	0.9298	3.3276	0.093377	1.4415	0.93868	2.5748
ROI 173	0.014021	-0.10014	-0.46038	1.5635	-0.38173	-1.2828	0.0072972	-0.75214
ROI 174	-1.0181	0.50675	1.0189	0.64598	0.42053	-0.80019	-0.4687	-1.2128
ROI 175	-1.387	1.1453	-0.15731	1.3256	1.4326	-1.5528	-1.4582	0.071768
ROI 176	-1.4962	-0.23572	-2.2313	-1.3699	0.012178	-1.4127	-1.672	-0.89625
ROI 177	-1.205	-0.24298	-0.57561	-1.3392	-1.2912	1.6144	0.29734	1.0186
ROI 178	-1.4451	1.7908	0.16763	1.5027	-0.68019	1.1642	-0.1519	1.1255
ROI 179	0.53847	-0.79883	0.6828	0.43891	0.66092	0.4294	-0.097333	0.4804
ROI 180	-1.2864	-1.0894	0.24458	-1.4971	-0.97753	1.8938	1.1713	0.9895
ROI 181	-1.9234	-1.4227	-1.3182	-0.91476	-1.756	2.8277	0.80765	0.32961
ROI 182	-0.64064	0.39904	-2.3641	0.45087	-1.0234	0.094422	1.632	-0.1523
ROI 183	-0.26852	0.10408	0.26903	0.88784	-0.53158	2.6492	4.1813	2.4588
ROI 184	-0.31129	0.26291	-0.49756	-0.14457	1.3047	0.87758	1.8343	1.1069
ROI 185	-0.52184	1.8091	-0.47013	0.40434	-1.2214	0.024463	0.85242	-0.032204
ROI 186	-1.9784	-0.93824	-0.41299	1.2326	0.18723	-0.34765	-0.81019	-0.912
ROI 187	-1.3984	-0.17234	0.64637	1.3997	-0.8443	-1.1948	-0.88049	-2.002
ROI 188	-1.6712	1.6678	-1.0363	1.088	-0.23426	-0.33275	-0.93958	-0.70309
ROI 189	1.6852	0.017162	1.7896	-0.31998	0.43056	0.31616	1.4838	1.5189
ROI 190	0.8857	-0.45549	0.24747	0.10049	-0.46709	1.7	2.5722	1.1413
ROI 191	2.103	0.13599	2.2798	-0.0063682	-0.27837	2.8809	3.0139	1.4309
ROI 192	-0.78256	0.90633	-0.67288	0.20374	0.27633	0.36653	-0.83699	-1.1187
ROI 193	1.2578	-1.1785	-1.6325	-0.46703	1.8497	-1.2929	-0.021829	0.78123
ROI 194	1.1106	-0.77167	-1.3601	-0.44914	-0.80806	-1.2123	1.0805	-1.0417
ROI 195	0.21758	-0.42086	-0.94205	-1.6619	0.32722	-0.79798	-0.20676	-1.159
ROI 196	0.67962	-0.21445	0.61086	0.81013	-0.23358	0.76746	1.667	1.8359
ROI 197	0.31191	-0.57533	1.303	0.18526	1.191	0.12268	0.11226	1.0639
ROI 198	0.6493	-0.27858	1.2884	1.0134	-1.0793	-0.74034	0.85793	0.58375
ROI 199	0.51701	-0.51226	-0.8926	0.91034	0.20312	1.4396	0.14762	-0.27753
ROI 200	-0.1269	-0.5643	0.38836	0.69461	0.14679	-1.0519	0.076929	-0.081463
ROI 201	0.58786	-0.33599	0.023318	3.0572	-1.1905	0.081658	0.13489	-0.37047
ROI 202	1.511	-0.41362	0.039886	0.34505	0.061769	0.52	1.1984	0.79706
ROI 203	-1.0555	1.3802	-1.3278	0.22161	0.53189	-1.2478	-1.3039	-1.0501
ROI 204	0.45391	-0.35504	-0.25786	-0.089214	-0.38971	-0.26199	0.6873	1.0304
ROI 205	-0.30309	0.15397	0.37367	0.062404	-0.36744	-0.10594	0.49426	0.089577
ROI 206	-0.27929	-1.0072	0.57323	-1.4247	-1.0876	-0.29034	-0.033881	0.45411
ROI 207	0.32209	-0.41366	-0.46555	0.57982	-1.4083	-0.396	-0.71717	0.39557
ROI 208	0.22131	-1.3369	0.98264	-0.31091	-0.39917	-0.10636	0.16887	-0.21517
ROI 209	0.95054	-0.24299	1.2652	0.69968	0.10873	-0.42932	1.2227	0.21801
ROI 210	0.7933	0.15245	2.512	0.24157	1.2102	-0.84059	0.78615	0.28029
ROI 211	1.4718	-0.77559	-0.58486	1.6067	-0.088043	-0.70479	-0.090009	3.1981
ROI 212	1.7336	-0.60744	1.9914	0.6289	0.12512	-0.72628	1.3647	0.48715
ROI 213	-0.50976	0.49706	1.2929	0.10159	-1.2686	-0.20182	-1.191	-0.63065
ROI 214	0.46124	-0.58593	0.096234	1.0864	-1.1141	-0.55266	0.24144	0.13765
ROI 215	0.31887	-1.0352	1.5202	1.2962	0.1762	-0.43875	1.8692	-0.22877
ROI 216	-1.5931	0.44656	-1.6042	-0.72777	0.032119	-0.98347	-1.766	-0.75264
ROI 217	-0.43353	1.0262	0.33725	-0.13209	0.40014	-0.32781	-0.42902	-0.71868
ROI 218	-0.24273	0.58873	1.0099	0.54859	-0.96547	1.7336	2.1764	0.40285
ROI 219	-0.21571	-1.6153	-1.055	-1.2158	-1.8732	0.29172	0.53999	-0.345
ROI 220	0.23381	1.7088	1.1438	-1.4094	0.68851	0.34076	-1.2256	-0.76974
ROI 221	-0.26429	1.5624	0.31123	0.62196	0.64326	-0.081901	-1.1416	-0.99788
ROI 222	-0.043727	2.1024	-0.89489	-0.41556	-0.091376	-0.92293	-1.2395	-0.90161
ROI 223	-1.4293	1.1207	-1.5362	-0.6482	-1.4599	-1.0066	-1.4035	-0.76678
ROI 224	-1.3107	2.1502	-0.99282	-0.79975	-0.64188	0.017149	-1.4538	-0.84024
ROI 225	0.82237	1.0203	0.54585	1.2431	2.0843	0.09182	-0.50501	-0.18234
ROI 226	-1.5201	0.8104	-1.5258	-1.4521	-0.6557	-1.3221	-1.3056	-0.8985
ROI 227	1.063	-0.72203	0.44034	0.24048	-0.28204	0.44591	0.81598	1.0089
ROI 228	-0.054845	-0.64583	-0.75909	-0.74195	-0.9111	-0.14623	0.45731	-0.097423
ROI 229	0.11993	-1.1039	0.077269	-0.68461	1.9341	1.607	1.6421	0.22999
ROI 230	0.23078	-0.30659	0.74426	0.71122	0.83539	-0.045421	1.139	0.33118
ROI 231	0.5391	-1.9104	0.82641	-0.47167	-1.3322	2.0517	-0.77074	-0.31388
ROI 232	0.56514	-0.66216	0.073516	-1.9841	0.18681	0.58223	0.27479	-0.37525
ROI 233	0.63254	-0.84889	0.15824	-1.3945	-0.18256	1.5991	0.8523	0.4374
ROI 234	-0.61628	-0.60641	-0.20315	-1.1389	-0.85285	1.4164	0.045618	0.36281
ROI 235	0.79579	-1.065	-0.61251	0.27721	-0.41481	0.47527	-0.43079	-0.86008
ROI 236	0.86995	-0.58312	-1.0542	0.63355	1.5216	-0.87203	-0.78568	-0.95681
ROI 237	0.23072	0.72133	1.159	0.55417	-0.24428	0.68687	-0.58455	-0.16845
ROI 238	0.15913	1.5196	1.2423	0.34608	0.4408	1.1679	0.84863	0.5414
ROI 239	-0.39411	-0.88928	0.2534	-1.2588	0.72346	1.0331	-0.13866	0.80956
ROI 240	0.51015	-1.1368	1.4701	-0.54833	0.23138	0.63134	-0.50426	0.36127
ROI 241	0.60885	-0.96348	0.69886	-0.47267	-0.2033	1.4622	0.27044	0.42817
ROI 242	0.79258	0.30985	0.30148	-0.63293	2.3334	1.607	0.048316	-0.14063
ROI 243	-0.85117	-0.87837	0.0015887	-0.71397	-1.5174	-1.1097	-1.2341	-1.1398
ROI 244	0.6678	-0.99099	-0.61478	-0.41395	-0.15019	0.71373	0.13899	-0.69627
ROI 245	-0.84756	-1.172	-0.055358	-0.85883	-1.0051	0.21335	-0.041074	0.15105
ROI 246	-1.3311	-1.6118	-0.67873	-1.1451	-0.64364	-1.5111	-0.66948	-1.1183
ROI 247	0.90125	-0.54519	0.44132	0.80682	-0.23849	0.047295	-0.92771	-0.68514
ROI 248	-0.039718	-1.5568	0.27166	-0.21244	-0.57112	-0.27298	-0.48932	-0.19507
ROI 249	-1.2894	-0.76436	0.79817	-1.8109	1.1944	-0.9144	-1.1941	-1.2187
ROI 250	0.11974	-1.3347	-0.031421	-1.3971	-0.46483	-1.1109	-0.43891	-1.0329
ROI 251	0.55695	-0.27438	-1.2457	0.48029	-0.97634	1.6432	0.29166	0.64313
ROI 252	0.25814	0.087292	-0.23758	-1.0358	-0.3354	-1.252	-0.45083	0.37313
ROI 253	0.9803	-0.43048	1.2313	-0.19806	-0.92178	-0.085859	0.43498	0.94129
ROI 254	0.36465	-0.20659	0.13378	-0.22157	0.2493	-0.37656	-0.16139	-0.80333
ROI 255	0.35864	-0.7225	-0.30705	0.54625	0.24762	0.26382	-0.088251	0.47617
ROI 256	-0.10229	-0.99139	1.2835	-1.2743	-0.33729	0.53963	0.46862	0.56993
ROI 257	0.21496	-0.39012	2.9491	-0.63049	-0.78759	-1.0337	0.35463	-0.29552
ROI 258	2.1525	-0.61645	-0.74279	0.76097	-0.84369	0.078389	0.42859	2.1139
ROI 259	0.6801	-1.0669	2.6524	-0.91719	-0.92846	-0.5754	0.16042	-0.4705
ROI 260	1.1407	-0.69321	3.3802	0.67061	-0.27091	-1.5185	0.21182	-0.70267
ROI 261	-0.25756	1.1776	0.806	-0.15642	-0.60901	0.2925	-1.056	-0.59555
ROI 262	-1.7574	0.067525	-2.281	0.40157	0.071302	-1.5703	-1.2238	-1.3769
ROI 263	-1.277	0.18993	-1.709	-0.63713	0.89658	-1.3814	-0.68135	-1.1068
ROI 264	-0.58235	-0.3273	-0.76503	0.44966	-0.12126	-0.28884	-0.94737	-1.0663
ROI 265	-0.91741	1.5477	0.84985	-0.76946	1.1476	0.28482	-0.34577	-0.73651
ROI 266	-0.97852	1.6199	-0.31967	0.039454	-0.57281	0.36826	-0.81124	-0.86994
ROI 267	-0.28422	-0.080761	0.86277	-1.4914	-0.10176	0.82383	-0.5272	1.6215
ROI 268	-0.43938	0.030269	0.46197	0.58868	-0.69821	-0.00082185	-0.021051	-1.0169

## Sheet: Figure 4b
Contribution size	Scanner	Coil	fMRI manufacturer	Phase encoding
	0.015176	0.023855	0.031761	0.039129

## Sheet: Figure 5c
Site ID	Number of participants	Variance of sampling bias
ATT	31	0.00068251
ATV	77	0.00076956
COI	9	0.0011607
KUT	35	0.00077249
SWA	39	0.00050172
UTO	140	0.00047866

## Sheet: Figure 5d
	Actual variance	Predicted variance of Single-population model	Predicted variance of Different-subpopulation model
ATT	0.00068251	0.00094821	0.00069688
ATV	0.00076956	0.00031069	0.00052573
COI	0.0011607	0.0037612	0.0010752
KUT	0.00077249	0.00079965	0.00065497
SWA	0.00050172	0.00076558	0.00069392
UTO	0.00047866	0.00016673	0.0005963

## Sheet: Figure 5e
Absolute error	Single-population model	Different-subpopulation model
ATT	0.00026569	1.4362e-05
ATV	0.00045887	0.00024382
COI	0.0026005	8.5517e-05
KUT	2.7163e-05	0.00011752
SWA	0.00026386	0.0001922
UTO	0.00031193	0.00011765

## Sheet: Figure 6a
Subject ID	PC1	PC2			Mean PC1 value	Mean PC2 value
ID 1	1.2619	-7.4187		ATT	3.9742	-1.2572
ID 2	2.9874	5.7482		ATV	4.2039	2.8708
ID 3	2.8901	16.319		KUT	-2.3854	0.44529
ID 4	1.9685	2.2868		SWA	5.7103	-2.1827
ID 5	5.4797	8.7398		HUH	-15.077	-0.49548
ID 6	1.025	10.053		HKH	3.2963	1.5533
ID 7	4.5552	7.3056		COI	4.1755	-3.7146
ID 8	5.56	7.8593		KPM	0.73945	-3.933
ID 9	5.4397	7.9238		UTO	3.4473	-0.30745
ID 10	3.5288	9.9684		ASD	5.5909	-2.054
ID 11	4.4895	1.8683		MDD	-3.8986	1.0255
ID 12	7.0858	-2.5013		OCD	0.21207	-1.6466
ID 13	2.7843	-2.2705		SCZ	1.9566	1.5434
ID 14	2.8956	5.4382
ID 15	2.1548	3.0412
ID 16	6.3392	1.8751
ID 17	-0.93389	2.4969
ID 18	5.5629	6.1623
ID 19	2.2787	-1.619
ID 20	1.3789	-4.4274
ID 21	8.4281	8.0177
ID 22	7.2271	-0.36983
ID 23	6.7954	-4.7538
ID 24	2.452	9.0535
ID 25	5.5289	7.1675
ID 26	6.0427	2.7742
ID 27	5.4681	3.6239
ID 28	7.2844	11.749
ID 29	7.1235	5.5465
ID 30	7.1944	1.3646
ID 31	3.2731	3.8132
ID 32	1.7247	-3.6844
ID 33	2.5099	1.3651
ID 34	6.0782	4.2764
ID 35	2.7931	7.6474
ID 36	1.1586	-0.5568
ID 37	6.1787	0.36683
ID 38	7.5457	-0.73103
ID 39	8.6476	10.494
ID 40	8.055	8.7412
ID 41	7.245	0.78093
ID 42	2.2374	3.6768
ID 43	5.1474	-14.084
ID 44	3.2107	0.75604
ID 45	7.1204	-11.573
ID 46	3.1552	3.1222
ID 47	3.4453	-1.1632
ID 48	3.5425	4.6617
ID 49	1.7367	1.2318
ID 50	4.63	-8.6129
ID 51	4.5908	1.7527
ID 52	2.3718	5.7669
ID 53	4.4364	3.4337
ID 54	4.1447	-11.426
ID 55	3.8496	3.491
ID 56	6.5402	9.8386
ID 57	2.4821	5.4908
ID 58	2.7136	0.48211
ID 59	4.087	10.308
ID 60	1.364	0.78167
ID 61	6.7137	18.203
ID 62	0.16473	2.5167
ID 63	6.7834	5.6846
ID 64	2.3534	-8.519
ID 65	4.1385	12.977
ID 66	1.4522	2.2504
ID 67	3.9246	-0.62338
ID 68	5.4786	7.6978
ID 69	6.7066	7.8369
ID 70	3.753	-13.583
ID 71	5.7315	-6.3424
ID 72	8.6084	5.4052
ID 73	4.1594	-0.12802
ID 74	4.8081	-10.527
ID 75	4.6474	5.887
ID 76	8.9047	0.09797
ID 77	2.4072	-1.9223
ID 78	0.077945	-0.29967
ID 79	3.6452	-5.404
ID 80	4.775	13.225
ID 81	1.9319	8.8113
ID 82	3.7943	2.9276
ID 83	3.4214	1.4951
ID 84	0.80739	8.5641
ID 85	1.9955	1.8011
ID 86	6.7894	-10.327
ID 87	3.6032	5.7087
ID 88	2.0146	-5.8711
ID 89	2.088	-2.7129
ID 90	-0.13955	12.801
ID 91	2.793	-0.20504
ID 92	3.33	5.7843
ID 93	3.9785	3.9439
ID 94	6.7492	-4.6925
ID 95	4.2418	-7.8721
ID 96	5.3732	-10.633
ID 97	4.296	-7.5698
ID 98	2.0851	6.0075
ID 99	3.473	-0.49023
ID 100	3.7708	2.3159
ID 101	7.407	1.406
ID 102	4.1272	5.7742
ID 103	4.2372	-2.4458
ID 104	1.1115	-5.3819
ID 105	5.8132	-15.045
ID 106	2.1754	3.3006
ID 107	6.4163	-12.367
ID 108	1.688	-0.85103
ID 109	-6.3422	-5.5996
ID 110	7.367	14.285
ID 111	-5.5919	-7.3705
ID 112	-10.558	3.1902
ID 113	-0.51082	7.2737
ID 114	-6.0377	-6.0764
ID 115	-1.2674	-2.7398
ID 116	1.8879	-1.2169
ID 117	-3.893	6.0596
ID 118	2.0818	-8.7956
ID 119	-4.1373	-7.0916
ID 120	1.6256	-1.3249
ID 121	-5.2285	4.493
ID 122	0.15325	-9.7475
ID 123	1.7377	0.049656
ID 124	-0.28979	14.584
ID 125	-4.9168	-4.0868
ID 126	0.77028	7.7088
ID 127	-7.0898	4.2868
ID 128	-9.0571	-1.9079
ID 129	-7.5405	-0.26802
ID 130	4.9567	-0.92878
ID 131	1.3214	-6.8595
ID 132	-8.0647	-13.287
ID 133	-4.4372	1.306
ID 134	-2.5105	-2.4963
ID 135	1.041	16.086
ID 136	-2.6809	-0.11642
ID 137	1.6982	8.0563
ID 138	-5.2977	-6.8611
ID 139	-1.2594	4.8531
ID 140	-4.3434	-10.037
ID 141	-1.2546	11.684
ID 142	-8.0693	2.7993
ID 143	2.2478	5.681
ID 144	6.5027	-13.796
ID 145	8.7456	-6.5899
ID 146	6.3636	-9.344
ID 147	4.8993	-0.6592
ID 148	5.4763	3.8046
ID 149	7.1912	-16.332
ID 150	4.1353	-7.6209
ID 151	3.6148	4.2047
ID 152	9.0726	6.3479
ID 153	5.22	-10.203
ID 154	6.5454	-6.1635
ID 155	4.9344	6.7582
ID 156	2.8852	-9.1866
ID 157	2.2069	5.1279
ID 158	5.8906	-3.0337
ID 159	7.3142	0.60093
ID 160	3.8991	4.5647
ID 161	6.2774	4.1274
ID 162	4.8757	1.3696
ID 163	4.8579	3.3966
ID 164	2.5102	-14.379
ID 165	12.082	-4.1799
ID 166	6.7285	0.49637
ID 167	6.9462	-6.1764
ID 168	9.6156	4.012
ID 169	3.3596	-7.4989
ID 170	6.7042	3.1324
ID 171	3.8007	-0.80397
ID 172	5.3404	-4.2518
ID 173	6.9622	-1.6179
ID 174	3.9294	-1.9969
ID 175	1.7131	-8.5931
ID 176	6.5783	0.27641
ID 177	5.1391	1.4692
ID 178	6.7638	4.779
ID 179	4.1137	-10.878
ID 180	4.4029	-15.535
ID 181	10.074	16.365
ID 182	5.0307	2.8824
ID 183	-15.833	-0.64001
ID 184	-23.519	-4.388
ID 185	-17.383	2.1268
ID 186	-13.11	0.82151
ID 187	-13.996	0.99322
ID 188	-16.069	3.8667
ID 189	-15.229	3.9979
ID 190	-13.188	-5.3359
ID 191	-12.976	12.712
ID 192	-12.872	-12.747
ID 193	-13.032	-6.1353
ID 194	-7.7042	5.0644
ID 195	-5.1717	8.6554
ID 196	-10.769	-3.3093
ID 197	-17.535	-0.42686
ID 198	-9.9882	-2.455
ID 199	-19.149	-0.62697
ID 200	-15.808	-6.4267
ID 201	-12.102	3.2436
ID 202	-10.176	-1.8953
ID 203	-13.684	0.62798
ID 204	-11.749	3.7852
ID 205	-14.473	-3.7564
ID 206	-11.427	-5.1036
ID 207	-11.025	9.1879
ID 208	-11.372	-6.959
ID 209	-22.856	1.3031
ID 210	-19.531	-3.7822
ID 211	-15.74	-3.915
ID 212	-15.348	-2.8366
ID 213	-14.04	-11.407
ID 214	-21.879	4.885
ID 215	-10.905	-3.1311
ID 216	-17.98	1.598
ID 217	-18.052	0.60471
ID 218	-18.201	-2.4126
ID 219	-15.95	-3.009
ID 220	-13.23	-3.7737
ID 221	-14.351	-3.4075
ID 222	-20.024	5.5806
ID 223	-18.01	-1.7596
ID 224	-12.768	1.8574
ID 225	-15.3	3.1282
ID 226	-17.251	-2.8909
ID 227	-13.27	-0.64324
ID 228	-19.754	-3.2339
ID 229	-18.548	-1.6836
ID 230	-13.223	-2.1022
ID 231	-16.76	-0.53142
ID 232	-15.485	1.5975
ID 233	-24.193	5.4877
ID 234	-13.986	6.2549
ID 235	-20.403	10.896
ID 236	-8.6176	-11.425
ID 237	-12.442	-8.8259
ID 238	-13.485	-0.12991
ID 239	-10.323	-8.4483
ID 240	-10.875	6.3913
ID 241	-14.106	6.2606
ID 242	-18.783	0.97626
ID 243	-7.691	-0.49242
ID 244	-14.637	-2.8805
ID 245	-18.727	-2.5095
ID 246	-21.641	-2.0579
ID 247	-22.659	5.4796
ID 248	-14.699	-2.5909
ID 249	-10.942	7.4749
ID 250	-13.861	2.6625
ID 251	-16.204	3.713
ID 252	-12.03	4.8947
ID 253	-21.673	-2.3235
ID 254	-9.1608	3.2985
ID 255	-12.119	7.0588
ID 256	-15.578	3.7957
ID 257	-18.103	10.232
ID 258	-20.595	-0.35464
ID 259	-13.801	-1.3254
ID 260	-18.447	0.19662
ID 261	-15.129	2.6509
ID 262	-16.507	3.5627
ID 263	-14.974	-6.6239
ID 264	-16.541	-4.0147
ID 265	-15.738	0.90533
ID 266	-16.641	-2.3352
ID 267	-15.227	0.39901
ID 268	-13.874	-6.1664
ID 269	-16.694	-0.12185
ID 270	-11.099	-2.1801
ID 271	-11.191	-2.1215
ID 272	-18.935	-0.4584
ID 273	-13.599	5.7136
ID 274	-10.311	11.884
ID 275	-15.246	2.2354
ID 276	-21.357	-2.5493
ID 277	-17.702	3.1282
ID 278	-15.044	8.6909
ID 279	-19.688	-4.3119
ID 280	-16.207	7.3258
ID 281	-16.863	-2.5227
ID 282	-10.513	-0.03497
ID 283	-22.457	-1.3128
ID 284	-11.38	6.4387
ID 285	-9.7818	-1.1502
ID 286	-12.563	0.92274
ID 287	-10.455	8.3921
ID 288	-19.074	-7.4402
ID 289	-11.681	-4.8439
ID 290	-17.541	-2.661
ID 291	-15.635	3.6883
ID 292	-16.469	-5.3574
ID 293	-15.02	-1.6252
ID 294	-14.912	3.5609
ID 295	-12.392	5.1173
ID 296	-6.0889	3.8802
ID 297	-20.462	-6.0881
ID 298	-13.784	-8.3979
ID 299	-14.645	5.0101
ID 300	-14.819	-2.3051
ID 301	-5.6014	-3.5504
ID 302	-17.421	3.9677
ID 303	-11	15.015
ID 304	-9.9006	0.52836
ID 305	-17.157	-4.0209
ID 306	3.7891	2.5806
ID 307	3.0968	6.8246
ID 308	-0.59296	0.81711
ID 309	6.1485	8.2412
ID 310	6.6843	11.285
ID 311	3.5748	1.1105
ID 312	0.58369	-11.496
ID 313	1.7886	-13.254
ID 314	5.363	11.76
ID 315	6.9796	11.804
ID 316	2.0544	2.1164
ID 317	0.085628	-13.15
ID 318	1.0007	-9.6171
ID 319	3.4548	3.4676
ID 320	0.18063	-0.019514
ID 321	0.015447	2.4629
ID 322	6.3116	22.883
ID 323	2.4182	7.334
ID 324	-0.61338	-5.0149
ID 325	5.4081	-5.0091
ID 326	1.2413	-0.17003
ID 327	7.5008	-10.237
ID 328	5.3942	-6.5669
ID 329	6.1082	-7.684
ID 330	7.3628	0.13076
ID 331	-1.1356	-2.2405
ID 332	4.1009	7.9565
ID 333	1.5988	-9.611
ID 334	3.2859	2.1076
ID 335	4.1762	5.692
ID 336	10.297	-1.5774
ID 337	3.1908	-1.0545
ID 338	4.9212	4.9623
ID 339	2.7938	-4.7992
ID 340	2.0173	-8.3869
ID 341	5.8858	3.6317
ID 342	2.2255	-0.31627
ID 343	6.7366	2.5319
ID 344	6.9699	3.1373
ID 345	4.8965	4.151
ID 346	0.88315	0.91736
ID 347	2.8083	3.1282
ID 348	4.629	-0.037217
ID 349	-0.35565	4.7788
ID 350	2.7608	-6.0079
ID 351	0.58316	-8.6303
ID 352	4.4284	-8.9524
ID 353	4.7539	8.0159
ID 354	3.6563	7.0522
ID 355	3.7189	-7.1186
ID 356	5.4184	2.9313
ID 357	3.8656	-3.4178
ID 358	2.0076	-12.176
ID 359	2.5339	5.2323
ID 360	8.4307	13.335
ID 361	8.1056	6.2865
ID 362	5.9085	-13.306
ID 363	7.3938	-1.5682
ID 364	3.9029	-8.3977
ID 365	-0.52786	-11.687
ID 366	2.0149	-10.392
ID 367	0.30218	-9.3411
ID 368	3.4986	-11.66
ID 369	1.9831	8.9732
ID 370	0.35586	-0.79787
ID 371	1.6965	-7.3969
ID 372	1.2794	-10.979
ID 373	-0.64783	7.3803
ID 374	2.2772	3.6979
ID 375	1.189	1.0697
ID 376	4.2647	-8.1125
ID 377	0.38873	-2.5548
ID 378	2.9171	-7.2954
ID 379	1.5869	-0.47357
ID 380	2.7535	-5.9886
ID 381	-2.9434	0.53211
ID 382	-2.0046	-3.4023
ID 383	-0.43328	-12.881
ID 384	-0.46821	-4.1621
ID 385	-0.27877	6.1404
ID 386	-0.65425	-8.9766
ID 387	-1.5421	-2.1514
ID 388	3.2793	7.098
ID 389	1.0085	-10.035
ID 390	6.4269	-6.6029
ID 391	-0.27617	-7.9699
ID 392	1.595	11.083
ID 393	0.77763	3.0845
ID 394	-0.47992	-6.7281
ID 395	2.6099	4.8897
ID 396	2.4372	-10.403
ID 397	1.5089	4.6494
ID 398	3.6701	3.6263
ID 399	0.30731	-4.4257
ID 400	3.9926	3.6183
ID 401	4.0972	2.0326
ID 402	2.2784	-1.5376
ID 403	5.6625	8.9519
ID 404	2.5493	12.676
ID 405	6.0344	-4.193
ID 406	2.484	8.0511
ID 407	3.8892	-4.2124
ID 408	5.2361	-6.0187
ID 409	4.363	7.0737
ID 410	1.1126	-6.0249
ID 411	3.6695	3.6132
ID 412	0.67253	-8.3856
ID 413	1.9777	2.3647
ID 414	5.2923	-7.6086
ID 415	4.8257	9.5004
ID 416	2.2612	1.5578
ID 417	1.9773	2.2148
ID 418	6.1925	0.7793
ID 419	3.9997	-10.661
ID 420	7.5333	11.774
ID 421	1.8909	8.5133
ID 422	5.3147	1.8555
ID 423	0.6525	4.614
ID 424	5.7295	-14.983
ID 425	6.2692	-2.1121
ID 426	2.96	-5.9857
ID 427	7.0402	3.6116
ID 428	-13.584	-5.1693
ID 429	3.8734	2.0365
ID 430	1.7954	-7.7353
ID 431	0.57276	-0.44471
ID 432	3.4445	-10.791
ID 433	5.0424	10.399
ID 434	0.717	8.9089
ID 435	4.4823	9.9584
ID 436	2.4388	3.8485
ID 437	1.1868	2.0062
ID 438	0.096432	-4.2262
ID 439	1.7092	-7.7712
ID 440	1.8082	-6.3548
ID 441	6.2065	4.4803
ID 442	1.8192	3.4006
ID 443	2.0632	-7.3473
ID 444	1.1615	1.3421
ID 445	2.2684	-4.4229
ID 446	6.1529	-4.8762
ID 447	1.3963	2.322
ID 448	3.1266	-7.7997
ID 449	3.595	0.93231
ID 450	2.7771	-1.4445
ID 451	4.061	1.0664
ID 452	3.446	-9.9045
ID 453	0.47805	5.1816
ID 454	-0.44559	-0.43881
ID 455	1.0235	1.591
ID 456	2.6247	5.4885
ID 457	2.0416	-2.8696
ID 458	4.3423	5.5453
ID 459	4.0537	-1.4546
ID 460	1.3534	10.144
ID 461	5.6426	-6.1116
ID 462	6.2734	0.379
ID 463	0.76606	-3.0249
ID 464	10.954	16.184
ID 465	2.1233	0.6507
ID 466	3.0272	3.7748
ID 467	4.9528	3.7556
ID 468	4.6484	7.002
ID 469	4.2607	6.7352
ID 470	3.9476	-2.6418
ID 471	5.4697	3.1878
ID 472	9.8843	-9.4636
ID 473	0.40626	4.8006
ID 474	6.0538	-1.4088
ID 475	4.3742	-4.9402
ID 476	11.052	-11.431
ID 477	3.1043	2.5291
ID 478	3.0855	10.129
ID 479	6.6403	-3.6894
ID 480	2.0921	0.55149
ID 481	2.9081	-10.601
ID 482	1.3648	5.0148
ID 483	2.191	-11.34
ID 484	3.1675	3.4294
ID 485	3.7794	-3.9816
ID 486	7.2369	9.8316
ID 487	-0.60356	-2.5954
ID 488	4.8725	2.5641
ID 489	7.0261	-0.44405
ID 490	0.54841	7.4022
ID 491	5.9612	-6.7202
ID 492	2.2915	0.39945
ID 493	0.43714	1.4373
ID 494	5.4129	7.9994
ID 495	4.9703	3.9774
ID 496	5.9334	-6.627
ID 497	1.6918	-3.615
ID 498	6.9662	-2.6334
ID 499	4.0573	3.4043
ID 500	5.6325	2.1047
ID 501	1.6422	2.2309
ID 502	0.90134	-3.4447
ID 503	4.3935	-7.3778
ID 504	4.5429	-13.723
ID 505	2.9294	1.3909
ID 506	5.4577	-7.5416
ID 507	5.7087	0.89358
ID 508	7.2607	-8.672
ID 509	6.9333	-16.112
ID 510	4.6693	-5.4217
ID 511	3.3326	1.5984
ID 512	4.6391	-4.1624
ID 513	4.1866	-8.2092
ID 514	6.3433	-1.9607
ID 515	5.6812	-17.954
ID 516	3.1479	-2.3333
ID 517	4.2291	-4.9781
ID 518	3.9047	0.48563
ID 519	4.5298	11.391
ID 520	-0.34698	-2.3547
ID 521	-0.10352	5.6333
ID 522	1.3534	-1.2037
ID 523	6.1494	12.199
ID 524	4.0225	3.9471
ID 525	4.0707	0.14948
ID 526	4.3053	6.9061
ID 527	4.1765	-5.3415
ID 528	2.5685	0.9456
ID 529	4.6934	7.5521
ID 530	4.9049	-5.4453
ID 531	7.5377	6.7307
ID 532	6.142	-0.5628
ID 533	7.7447	0.55766
ID 534	1.2294	0.42978
ID 535	0.74772	-0.67159
ID 536	4.248	-2.0434
ID 537	10.287	10.97
ID 538	9.0354	-2.1706
ID 539	1.6526	-8.4997
ID 540	2.6977	6.6189
ID 541	4.703	-13.899
ID 542	3.3184	-9.5708
ID 543	2.958	0.47108
ID 544	3.3232	11.84
ID 545	5.7097	14.311
ID 546	2.0401	8.2396
ID 547	4.1384	-11.214
ID 548	4.9574	-5.1932
ID 549	3.8665	-1.1338
ID 550	6.3732	2.7982
ID 551	3.703	-4.9075
ID 552	7.2365	0.53001
ID 553	4.9384	-0.51384
ID 554	7.9931	2.543
ID 555	8.1336	-4.7709
ID 556	5.9995	-0.27182
ID 557	-0.056761	9.4352
ID 558	4.2552	-10.11
ID 559	5.0227	8.2955
ID 560	-4.0104	5.7957
ID 561	5.2987	8.184
ID 562	3.9014	13.165
ID 563	5.8294	10.031
ID 564	0.52781	-2.0581
ID 565	7.6172	6.3739
ID 566	-3.7266	6.2317
ID 567	2.3854	5.6468
ID 568	2.0458	-0.27021
ID 569	1.1463	6.5604
ID 570	0.52079	0.449
ID 571	-0.86535	-3.6962
ID 572	0.55625	3.3768
ID 573	0.87523	-6.7627
ID 574	1.8533	5.5019
ID 575	-0.45754	5.4494
ID 576	-2.0362	4.8648
ID 577	2.0411	-7.1698
ID 578	-1.3193	1.2887
ID 579	0.23435	2.9161
ID 580	0.89829	-2.0724
ID 581	2.5754	-10.325
ID 582	0.53036	-10.458
ID 583	0.22192	-5.8515
ID 584	0.13098	-1.6144
ID 585	-2.4406	-0.51477
ID 586	-0.80092	-3.6875
ID 587	0.48112	-3.8249
ID 588	-0.77251	-6.5481
ID 589	0.0086114	2.6854
ID 590	0.14577	-0.35053
ID 591	1.0673	-5.8248
ID 592	-0.85491	-6.1969
ID 593	-1.8821	5.0236
ID 594	1.8226	-7.4056
ID 595	8.8764	1.2875
ID 596	12.882	-7.1957
ID 597	6.346	-1.5278
ID 598	1.7549	6.1907
ID 599	3.3318	-0.5876
ID 600	3.9685	-12.348
ID 601	8.1455	0.34316
ID 602	6.955	-10.28
ID 603	7.2482	9.7857
ID 604	3.3479	3.1945
ID 605	2.3107	-5.1776
ID 606	4.0672	4.9312
ID 607	4.1739	-5.8973
ID 608	6.3398	-2.2802
ID 609	6.8942	-5.4527
ID 610	5.8061	3.8384
ID 611	6.2649	-6.5725
ID 612	-4.2712	-9.4286
ID 613	6.6936	-4.8076
ID 614	3.3598	4.4138
ID 615	8.2181	-8.2297
ID 616	6.3124	-5.0852
ID 617	3.5986	4.2643
ID 618	6.1261	-8.3972
ID 619	7.6587	-4.265
ID 620	5.091	-10.974
ID 621	3.7325	0.80895
ID 622	4.0118	-2.2197
ID 623	8.1157	-5.4678
ID 624	4.8323	-12.563
ID 625	4.9625	4.2996
ID 626	3.8448	7.0652
ID 627	5.8472	5.4162
ID 628	3.7045	-0.41832
ID 629	5.3813	-2.5093
ID 630	6.7016	-12.368
ID 631	4.831	7.3076
ID 632	7.7622	9.9067
ID 633	2.1572	-4.3294
ID 634	2.2378	0.78984
ID 635	7.1976	7.5441
ID 636	3.013	1.9198
ID 637	6.2114	1.6
ID 638	10.633	-12.462
ID 639	9.55	-15.23
ID 640	10.569	-1.6369
ID 641	5.9776	-3.7325
ID 642	0.32663	-1.759
ID 643	6.4654	-11.349
ID 644	4.1322	4.8195
ID 645	3.9291	-3.8399
ID 646	7.1262	2.5011
ID 647	3.574	6.0004
ID 648	4.8579	-1.3147
ID 649	4.064	-1.6151
ID 650	8.1914	-2.4274
ID 651	7.5297	-0.36173
ID 652	1.6347	-2.4572
ID 653	-5.9297	4.6203
ID 654	4.2298	-1.3021
ID 655	0.87895	4.4255
ID 656	-0.68147	4.6882
ID 657	-1.1194	-4.6042
ID 658	1.283	-3.0107
ID 659	-9.6632	2.8637
ID 660	5.1968	-0.4057
ID 661	-2.5344	2.7171
ID 662	-7.3578	9.7171
ID 663	-5.8778	-2.3169
ID 664	0.81397	-15.386
ID 665	1.2659	1.9044
ID 666	1.2822	14.929
ID 667	1.1214	11.142
ID 668	2.843	5.9408
ID 669	0.06172	20.269
ID 670	-6.9274	5.7194
ID 671	4.4258	-4.9155
ID 672	-3.4818	-2.3529
ID 673	2.3841	5.4112
ID 674	4.4855	11.346
ID 675	5.2771	-15.5
ID 676	7.1289	1.2546
ID 677	5.0971	8.0175
ID 678	3.2478	-5.88
ID 679	4.8548	3.9694
ID 680	4.5432	5.4225
ID 681	6.3069	-8.5008
ID 682	2.2126	9.0585
ID 683	2.6219	6.1411
ID 684	0.98429	-3.0002
ID 685	4.6276	2.6047
ID 686	5.2028	4.5006
ID 687	-0.633	3.3137

## Sheet: Figure 6b
	Explained variance	Cumulative distribution
PC1	3.4718	3.4718
PC2	2.5384	6.0102
PC3	1.8119	7.8222
PC4	1.3488	9.171
PC5	1.1573	10.328
PC6	0.96124	11.289
PC7	0.9075	12.197
PC8	0.88491	13.082
PC9	0.79536	13.877
PC10	0.77494	14.652

## Sheet: Figure 6c
Subject ID	PC1	PC2			Mean PC1 value	Mean PC2 value
ID 1	-6.5294	-0.10271		ATT	-0.50299	-2.5352
ID 2	6.4173	-0.43295		ATV	2.958	1.5114
ID 3	17.066	-8.9729		KUT	-1.0947	0.12421
ID 4	2.2838	4.5939		SWA	-1.3318	0.55499
ID 5	9.1627	-3.3464		HUH	-0.79337	1.4325
ID 6	9.9907	1.118		HKH	2.4262	0.22628
ID 7	7.5277	-1.1772		COI	-1.9279	2.0105
ID 8	8.0593	-3.0093		KPM	-3.338	3.2978
ID 9	8.2355	-3.3302		UTO	-0.93316	1.2606
ID 10	10.145	-1.5219		ASD	-1.1152	-2.0516
ID 11	1.8614	2.6315		MDD	1.2167	-1.5354
ID 12	-1.7135	-8.7187		OCD	-1.0568	2.9419
ID 13	-1.5591	-3.0196		SCZ	0.93044	-4.5041
ID 14	6.3299	-3.4888
ID 15	3.7418	-2.8724
ID 16	2.8114	-2.578
ID 17	2.3447	2.2832
ID 18	6.3949	3.4742
ID 19	-1.6507	2.3178
ID 20	-4.5105	7.0663
ID 21	8.4371	11.93
ID 22	-0.10148	-9.6243
ID 23	-4.8022	6.5007
ID 24	9.069	-4.0176
ID 25	7.2402	-6.3585
ID 26	3.0887	-5.6833
ID 27	3.5435	-1.8258
ID 28	12.133	-1.7962
ID 29	5.9104	-7.2492
ID 30	1.5196	-7.1409
ID 31	3.7715	10.268
ID 32	-3.6952	6.3157
ID 33	1.1124	4.3916
ID 34	4.6208	-2.9317
ID 35	7.6526	4.6813
ID 36	-0.53581	-3.2043
ID 37	0.67504	-10.151
ID 38	-0.88247	-2.2081
ID 39	10.726	1.1414
ID 40	8.6234	12.249
ID 41	0.78093	8.6127
ID 42	4.3067	-1.8675
ID 43	-13.255	-5.7558
ID 44	1.1957	4.208
ID 45	-10.661	-10.153
ID 46	4.0396	-4.4854
ID 47	-0.62509	-0.7556
ID 48	5.487	-1.5886
ID 49	1.4777	-1.7631
ID 50	-8.4641	-0.78354
ID 51	1.8406	8.4432
ID 52	5.99	2.2742
ID 53	3.2244	5.6283
ID 54	-11.403	-0.85173
ID 55	3.6251	-0.29696
ID 56	10.124	-1.0072
ID 57	5.7051	-4.5851
ID 58	0.50104	1.8486
ID 59	10.313	6.164
ID 60	0.81522	-2.3804
ID 61	18.469	-0.58354
ID 62	2.6563	-0.81217
ID 63	5.5798	16.025
ID 64	-8.5866	0.33772
ID 65	13.121	8.1704
ID 66	2.3256	1.4942
ID 67	-0.64	2.5452
ID 68	7.6939	-2.2756
ID 69	7.9232	8.6529
ID 70	-13.751	3.7006
ID 71	-6.0111	4.5308
ID 72	5.7726	0.088505
ID 73	-0.15945	2.4068
ID 74	-10.274	2.8509
ID 75	6.2243	-4.2245
ID 76	0.43462	2.967
ID 77	-1.764	1.2725
ID 78	-0.42931	-0.50513
ID 79	-5.6023	4.5245
ID 80	13.448	3.729
ID 81	8.9768	-3.2049
ID 82	2.8082	-0.074336
ID 83	1.1639	4.6234
ID 84	8.5372	-0.5838
ID 85	1.9925	-4.2026
ID 86	-10.299	-1.4325
ID 87	5.7244	6.3168
ID 88	-5.9831	12.938
ID 89	-2.7761	11.883
ID 90	12.912	-0.20624
ID 91	-0.081605	-0.11666
ID 92	5.8761	7.8541
ID 93	4.8644	3.1527
ID 94	-3.9018	-1.4348
ID 95	-7.0332	-3.5411
ID 96	-9.5129	-8.1925
ID 97	-6.9323	5.2922
ID 98	6.6811	-5.8962
ID 99	0.30638	-6.9427
ID 100	2.8479	-4.9116
ID 101	2.1484	-0.59576
ID 102	6.7384	-4.7402
ID 103	-1.9488	2.8373
ID 104	-5.1796	13.13
ID 105	-14.162	0.03241
ID 106	3.986	-2.7978
ID 107	-11.51	-5.7864
ID 108	-0.037823	-7.6125
ID 109	-7.476	8.1943
ID 110	13.033	-6.8769
ID 111	-9.0184	3.2456
ID 112	1.0764	2.0839
ID 113	5.6718	0.43247
ID 114	-7.7533	4.4717
ID 115	-4.5305	2.5197
ID 116	-2.706	-5.6891
ID 117	4.4394	-4.676
ID 118	-10.241	-1.7726
ID 119	-8.5702	-5.2053
ID 120	-2.5409	0.981
ID 121	2.7417	5.821
ID 122	-10.941	-7.6386
ID 123	-1.2439	3.5523
ID 124	13.274	-1.4841
ID 125	-5.7035	-7.8975
ID 126	6.5405	-0.045852
ID 127	2.5853	-3.3469
ID 128	-4.0249	5.5828
ID 129	-2.0978	3.0196
ID 130	-2.2258	-2.0268
ID 131	-7.9381	-0.27594
ID 132	-15.076	0.34004
ID 133	-0.16009	-4.3584
ID 134	-4.2073	10.305
ID 135	14.772	-1.0689
ID 136	-1.7808	6.7428
ID 137	6.9547	-0.74631
ID 138	-8.639	1.1624
ID 139	3.4787	-1.1557
ID 140	-11.644	-0.88872
ID 141	10.24	-4.9099
ID 142	1.0051	2.2026
ID 143	4.3937	3.7536
ID 144	-13.17	12.294
ID 145	-5.9472	13.008
ID 146	-8.6246	-5.414
ID 147	0.039769	8.7192
ID 148	4.9668	-2.47
ID 149	-15.132	-6.0658
ID 150	-6.9454	10.054
ID 151	5.2144	-4.523
ID 152	7.2463	-3.7076
ID 153	-9.3455	1.4596
ID 154	-5.4069	6.7005
ID 155	7.4639	0.15142
ID 156	-8.4525	0.61411
ID 157	5.6843	7.9303
ID 158	-2.2948	-10.389
ID 159	1.4624	6.8454
ID 160	5.4097	-1.9654
ID 161	5.1233	-5.9475
ID 162	2.1205	-2.0023
ID 163	4.3272	-3.1767
ID 164	-13.324	2.2778
ID 165	-2.8288	-9.6672
ID 166	1.1805	-2.0319
ID 167	-5.3102	-3.4868
ID 168	5.1908	-0.63358
ID 169	-6.4943	-0.86052
ID 170	4.2293	-5.6104
ID 171	-0.58925	10.599
ID 172	-3.1653	-2.7029
ID 173	-0.67543	-2.72
ID 174	-1.201	-3.2257
ID 175	-8.3343	14.262
ID 176	1.1853	2.103
ID 177	2.055	5.1929
ID 178	5.7748	-4.7836
ID 179	-10.044	-3.6714
ID 180	-14.43	-0.49858
ID 181	17.51	2.4103
ID 182	3.5895	2.5777
ID 183	-1.104	11.776
ID 184	-5.6734	15.329
ID 185	1.6632	-0.30847
ID 186	0.42887	8.3354
ID 187	0.72949	4.1057
ID 188	3.5641	0.93942
ID 189	3.6719	3.5023
ID 190	-5.3562	-2.9869
ID 191	12.576	-6.3129
ID 192	-12.874	-0.96519
ID 193	-6.6825	3.872
ID 194	4.8442	5.2717
ID 195	8.802	1.1894
ID 196	-3.4031	4.8566
ID 197	-0.80832	-6.1885
ID 198	-2.4901	-2.0784
ID 199	-0.99757	2.0969
ID 200	-6.7836	-0.22569
ID 201	3.0931	1.803
ID 202	-1.7977	-4.2664
ID 203	0.30523	-5.3085
ID 204	3.761	-0.34354
ID 205	-3.8606	-1.5812
ID 206	-5.2243	0.76336
ID 207	8.5961	-3.376
ID 208	-7.372	7.2327
ID 209	0.48211	8.2337
ID 210	-4.0794	-1.3162
ID 211	-4.0671	-3.0043
ID 212	-3.1074	1.8486
ID 213	-11.865	4.345
ID 214	4.2861	3.601
ID 215	-3.2044	-2.2992
ID 216	1.2903	6.7887
ID 217	0.080847	4.0652
ID 218	-2.5451	-3.3113
ID 219	-3.7347	24.28
ID 220	-3.8273	-3.5764
ID 221	-3.4761	-3.6887
ID 222	5.1259	-2.1847
ID 223	-2.1653	-4.0548
ID 224	1.7175	-2.7658
ID 225	2.6405	7.4588
ID 226	-3.287	0.24297
ID 227	-0.56859	-3.2476
ID 228	-3.5512	-3.1167
ID 229	-2.0048	6.875
ID 230	-2.2533	-2.0411
ID 231	-0.65724	-0.10261
ID 232	1.4369	-1.6631
ID 233	4.8024	7.1825
ID 234	5.922	-2.6428
ID 235	10.059	10.522
ID 236	-11.411	-2.8588
ID 237	-9.142	13.394
ID 238	-0.10619	-3.0852
ID 239	-8.4906	1.2029
ID 240	5.9276	5.3818
ID 241	5.9459	4.5901
ID 242	0.56022	-1.4295
ID 243	-0.059064	-5.0352
ID 244	-3.1484	-6.7061
ID 245	-2.6724	-0.53516
ID 246	-2.9331	7.0077
ID 247	5.0885	-0.33103
ID 248	-2.9805	-0.60722
ID 249	7.3576	-3.1053
ID 250	2.2047	10.934
ID 251	3.3002	-1.4387
ID 252	5.1675	1.0337
ID 253	-2.8091	0.16904
ID 254	3.2687	1.5056
ID 255	6.924	2.8768
ID 256	3.0447	10.764
ID 257	9.9271	-1.257
ID 258	-0.78061	-0.97244
ID 259	-1.3824	-2.5486
ID 260	-0.2706	1.2685
ID 261	2.2785	5.5024
ID 262	3.3935	1.4855
ID 263	-6.7528	8.6063
ID 264	-4.1862	-3.3314
ID 265	0.5226	-7.6616
ID 266	-2.6489	-1.4533
ID 267	0.15656	-5.041
ID 268	-6.0808	-1.3115
ID 269	-0.48908	4.0759
ID 270	-1.9493	-1.5951
ID 271	-2.3194	-0.69517
ID 272	-0.7351	-0.84439
ID 273	5.5599	-3.2373
ID 274	12.238	1.5898
ID 275	1.5622	-4.9992
ID 276	-3.1741	0.096982
ID 277	2.9068	-2.3628
ID 278	8.3554	-0.029979
ID 279	-4.5984	-4.2265
ID 280	7.0526	2.1662
ID 281	-2.693	1.0071
ID 282	0.090626	-3.5379
ID 283	-1.9043	3.9452
ID 284	6.2775	2.353
ID 285	-1.2298	0.33628
ID 286	0.67501	-3.8245
ID 287	8.6051	0.82561
ID 288	-7.9195	-0.75468
ID 289	-5.0272	-6.058
ID 290	-2.8817	-3.4413
ID 291	3.507	-1.9669
ID 292	-5.6847	-0.52144
ID 293	-1.7414	-1.7952
ID 294	3.4957	-2.7574
ID 295	4.9787	-0.83535
ID 296	3.8832	-2.4115
ID 297	-6.6143	-2.879
ID 298	-8.2916	1.6078
ID 299	4.9057	0.022977
ID 300	-2.4001	-6.4123
ID 301	-3.3269	-4.6269
ID 302	3.6903	-5.0128
ID 303	14.805	-6.4568
ID 304	0.5601	-2.0286
ID 305	-4.1574	-4.1865
ID 306	3.4732	-2.2017
ID 307	7.1871	17.39
ID 308	1.8344	-5.6407
ID 309	9.2947	-6.7921
ID 310	12.297	-5.0033
ID 311	2.2444	-2.0268
ID 312	-10.764	-4.3178
ID 313	-12.658	2.6646
ID 314	12.677	10.318
ID 315	12.915	-2.1832
ID 316	3.0009	2.5055
ID 317	-12.387	-1.9966
ID 318	-8.5823	-3.7054
ID 319	4.6584	-0.34585
ID 320	1.0526	-6.4134
ID 321	2.9993	3.7574
ID 322	23.803	-5.2493
ID 323	8.0834	-0.70407
ID 324	-4.1938	-0.61974
ID 325	-3.0036	-5.9516
ID 326	1.6493	-2.1457
ID 327	-8.315	0.58301
ID 328	-4.6835	0.598
ID 329	-5.8981	10.057
ID 330	2.0214	-1.505
ID 331	-0.763	1.6833
ID 332	9.578	8.5153
ID 333	-7.9367	6.2604
ID 334	3.8285	1.4989
ID 335	7.6922	-2.4737
ID 336	0.18183	-8.3333
ID 337	0.77008	-0.074616
ID 338	6.8054	-4.7121
ID 339	-3.0344	-6.4517
ID 340	-6.7934	2.6814
ID 341	5.5646	-0.44261
ID 342	1.3632	-1.7753
ID 343	4.6042	-5.8756
ID 344	5.0733	11.331
ID 345	5.8684	2.03
ID 346	2.6652	-4.6894
ID 347	4.9432	-1.9879
ID 348	2.0789	-6.3203
ID 349	6.366	-1.3469
ID 350	-4.6022	5.5996
ID 351	-6.8831	-4.0473
ID 352	-6.9706	-7.0248
ID 353	9.7411	12.907
ID 354	8.9176	-3.6097
ID 355	-5.5058	6.5614
ID 356	4.9171	-4.6831
ID 357	-1.583	-7.5857
ID 358	-10.45	0.17389
ID 359	6.9574	-2.7151
ID 360	15.3	2.01
ID 361	8.3555	-6.0299
ID 362	-11.261	-1.7044
ID 363	0.46629	-4.8817
ID 364	-6.5779	-3.0433
ID 365	-10.918	-1.2329
ID 366	-9.718	3.0182
ID 367	-8.6999	3.2022
ID 368	-10.888	-6.3638
ID 369	9.6672	9.1464
ID 370	-0.41473	15.664
ID 371	-6.4525	1.9405
ID 372	-10.353	-4.3337
ID 373	7.9138	-4.0663
ID 374	4.1881	3.1727
ID 375	1.8125	1.623
ID 376	-7.3746	4.826
ID 377	-1.9981	6.2441
ID 378	-6.8287	9.6754
ID 379	0.073199	-5.1657
ID 380	-5.2969	3.8978
ID 381	0.89147	7.2435
ID 382	-2.9671	3.1858
ID 383	-12.454	5.0959
ID 384	-3.6136	9.5754
ID 385	6.778	3.901
ID 386	-8.4306	2.8674
ID 387	-1.6905	2.7318
ID 388	6.4765	1.7372
ID 389	-10.517	3.5526
ID 390	-7.026	6.416
ID 391	-8.4699	0.61308
ID 392	10.168	13.907
ID 393	2.5381	-5.8261
ID 394	-7.5681	10.686
ID 395	4.0542	7.834
ID 396	-10.868	7.2681
ID 397	4.0712	2.9662
ID 398	3.0993	6.8521
ID 399	-4.9748	2.5651
ID 400	3.2057	-1.5211
ID 401	1.4085	0.30349
ID 402	-2.352	6.27
ID 403	8.3023	3.5997
ID 404	12.181	0.90218
ID 405	-4.6906	-6.0863
ID 406	7.4334	2.2706
ID 407	-4.9747	5.4045
ID 408	-6.4529	1.8604
ID 409	6.5595	-2.8942
ID 410	-6.8407	4.6013
ID 411	3.0707	-1.6487
ID 412	-9.0399	4.761
ID 413	1.7457	-3.5355
ID 414	-8.2549	-0.90462
ID 415	8.8845	0.28408
ID 416	0.83241	5.9688
ID 417	1.6135	-3.7586
ID 418	0.38682	-8.144
ID 419	-11.674	7.3609
ID 420	11.319	5.4408
ID 421	7.9118	4.7982
ID 422	1.3293	0.34613
ID 423	3.98	-4.0631
ID 424	-15.595	-0.71657
ID 425	-2.5204	-4.4276
ID 426	-6.9779	9.9593
ID 427	3.3217	-6.2329
ID 428	-6.4729	-0.89836
ID 429	1.452	0.71873
ID 430	-8.5517	4.9769
ID 431	-1.2847	3.5645
ID 432	-11.241	-1.7151
ID 433	9.7266	-0.19005
ID 434	8.064	2.7485
ID 435	9.5078	1.0467
ID 436	3.0898	2.4898
ID 437	1.2205	1.0882
ID 438	-4.9532	3.3286
ID 439	-8.4111	-0.74814
ID 440	-7.4458	15.78
ID 441	4.0562	-2.5532
ID 442	2.6776	2.9598
ID 443	-7.9564	-0.36647
ID 444	0.5625	-1.7529
ID 445	-5.3912	5.4829
ID 446	-5.3329	-5.3868
ID 447	1.7999	-1.8431
ID 448	-8.5951	7.5721
ID 449	0.1257	5.0021
ID 450	-1.9006	0.17911
ID 451	0.1702	5.9283
ID 452	-10.689	-2.5281
ID 453	4.6389	-1.4201
ID 454	-1.4142	8.2389
ID 455	0.71571	10.745
ID 456	4.8852	0.56969
ID 457	-3.6503	3.5271
ID 458	5.0953	-0.90691
ID 459	-2.0746	0.16528
ID 460	9.5646	0.026038
ID 461	-6.7514	5.9617
ID 462	-0.21427	2.0599
ID 463	-4.0272	5.8974
ID 464	15.89	-3.8041
ID 465	-0.015381	5.3598
ID 466	3.2422	2.3005
ID 467	3.2006	-0.59609
ID 468	6.4568	-1.4065
ID 469	6.2248	-2.0026
ID 470	-3.1805	6.0616
ID 471	2.6674	3.7844
ID 472	-9.6542	-12.16
ID 473	4.1707	-1.036
ID 474	-2.1179	3.2856
ID 475	-5.5615	2.0214
ID 476	-11.615	-5.2979
ID 477	1.9569	1.0564
ID 478	9.3196	2.6355
ID 479	-4.1682	3.3058
ID 480	0.021858	-3.643
ID 481	-11.158	4.4485
ID 482	4.5229	2.2752
ID 483	-12.104	8.3445
ID 484	2.6732	-3.0093
ID 485	-4.8238	7.2274
ID 486	9.4907	-5.0696
ID 487	-3.1863	-2.9962
ID 488	2.2185	-7.642
ID 489	-0.88144	-4.462
ID 490	6.4962	7.5435
ID 491	-7.169	-0.27319
ID 492	-0.3422	2.0707
ID 493	0.69472	3.2431
ID 494	7.4208	0.24506
ID 495	3.42	0.25797
ID 496	-7.2646	-1.2073
ID 497	-4.3159	-1.6113
ID 498	-3.0158	-6.2046
ID 499	2.8742	0.02609
ID 500	1.3708	-1.3257
ID 501	1.752	1.6557
ID 502	-4.0358	-0.24709
ID 503	-8.0018	-5.8888
ID 504	-14.36	3.5704
ID 505	0.87422	-0.81888
ID 506	-8.1057	3.2979
ID 507	0.39252	-2.3657
ID 508	-9.4341	-8.557
ID 509	-16.386	-9.1579
ID 510	-6.0735	-4.8375
ID 511	1.2359	-1.8401
ID 512	-4.7294	13.419
ID 513	-8.7854	4.0399
ID 514	-2.5092	-4.9892
ID 515	-18.634	-4.1112
ID 516	-3.1021	3.6888
ID 517	-5.4503	4.5888
ID 518	-0.2571	6.0681
ID 519	10.721	-2.1494
ID 520	-3.2538	6.3894
ID 521	4.8487	11.639
ID 522	-1.7553	-5.6188
ID 523	11.73	-0.2418
ID 524	3.3502	-0.9041
ID 525	-0.56192	6.5917
ID 526	5.9535	13.444
ID 527	-5.9157	-10.45
ID 528	0.60315	-4.7033
ID 529	7.0619	5.4067
ID 530	-5.9528	-7.484
ID 531	6.511	-2.9296
ID 532	-0.94885	0.17448
ID 533	0.24635	-9.292
ID 534	-0.041106	0.74718
ID 535	-1.2297	-1.5696
ID 536	-2.5405	-2.3365
ID 537	10.777	-3.5342
ID 538	-2.5148	-3.9122
ID 539	-9.1303	-1.1173
ID 540	5.9197	-2.1443
ID 541	-14.414	-4.1981
ID 542	-10.329	-3.0889
ID 543	-0.10009	-1.3561
ID 544	11.037	-0.35912
ID 545	13.834	-0.96289
ID 546	7.5011	-3.0291
ID 547	-11.743	-0.33271
ID 548	-5.8147	-2.0297
ID 549	-1.7415	1.5671
ID 550	2.3901	-8.2128
ID 551	-5.6541	-0.7598
ID 552	-0.060343	-1.2797
ID 553	-1.1402	1.5986
ID 554	2.1809	-4.8606
ID 555	-5.344	-5.4742
ID 556	-0.75709	-6.4984
ID 557	8.7968	1.1531
ID 558	-10.486	-5.594
ID 559	7.9462	-5.7383
ID 560	4.3825	-1.1047
ID 561	7.0101	-1.079
ID 562	12.304	-7.5457
ID 563	9.3163	-5.4645
ID 564	-3.1306	-7.8974
ID 565	5.4628	-1.3442
ID 566	4.3778	3.1734
ID 567	4.398	-2.1301
ID 568	0.49333	8.4134
ID 569	7.2855	10.329
ID 570	1.0474	2.0821
ID 571	-3.0208	-5.5613
ID 572	3.8259	7.3262
ID 573	-6.2564	1.4887
ID 574	6.0674	3.3944
ID 575	6.1066	-0.9112
ID 576	5.2917	-0.16215
ID 577	-6.5379	2.2553
ID 578	1.83	5.4975
ID 579	3.3977	15.196
ID 580	-1.7366	10.814
ID 581	-9.3538	-2.7482
ID 582	-9.7029	-3.4548
ID 583	-5.1993	-0.63151
ID 584	-1.0082	-1.3697
ID 585	0.1132	-2.0105
ID 586	-3.0702	4.4583
ID 587	-3.4	15.356
ID 588	-5.96	1.9196
ID 589	3.119	-6.496
ID 590	0.096544	12.95
ID 591	-5.3207	3.5602
ID 592	-5.6204	0.31409
ID 593	5.5725	3.3064
ID 594	-6.5944	-5.8834
ID 595	2.3339	-8.1314
ID 596	-6.0249	-15.756
ID 597	-0.39249	-4.7824
ID 598	6.7303	3.7037
ID 599	0.37723	-0.66171
ID 600	-11.398	-3.3219
ID 601	1.2678	3.8085
ID 602	-9.1587	-5.7816
ID 603	10.878	-3.5793
ID 604	4.027	6.6853
ID 605	-4.3714	0.31044
ID 606	5.8199	-3.0828
ID 607	-4.9882	1.9804
ID 608	-1.2306	-3.5387
ID 609	-4.5137	-0.73961
ID 610	4.8408	0.080819
ID 611	-5.9395	8.7528
ID 612	-8.9202	4.2534
ID 613	-3.764	-4.4354
ID 614	5.2034	-0.22123
ID 615	-7.4205	-10.816
ID 616	-4.4047	-0.040094
ID 617	5.0486	-4.386
ID 618	-7.4662	-5.7905
ID 619	-3.055	-7.8409
ID 620	-9.8415	-7.6138
ID 621	1.6585	0.2525
ID 622	-1.5654	3.7303
ID 623	-4.6054	13.526
ID 624	-11.504	-0.80601
ID 625	5.2752	-1.2653
ID 626	8.0175	5.5258
ID 627	6.2446	-4.1931
ID 628	0.48834	-1.5814
ID 629	-1.6283	-4.1448
ID 630	-11.37	-1.0991
ID 631	8.5099	-1.4592
ID 632	10.669	2.6222
ID 633	-3.5645	-5.09
ID 634	1.7164	-3.6534
ID 635	8.5203	0.41954
ID 636	2.9321	-4.9372
ID 637	2.428	-6.4546
ID 638	-11.072	-12.15
ID 639	-13.9	-6.9768
ID 640	-0.53378	-4.2114
ID 641	-2.7687	-3.5372
ID 642	-1.0155	-4.4947
ID 643	-10.616	-13.813
ID 644	5.7858	-5.918
ID 645	-2.9245	-6.5686
ID 646	3.572	-5.4404
ID 647	6.9349	-1.1914
ID 648	-0.19667	-8.6618
ID 649	-0.77134	-4.7394
ID 650	-1.1981	-10.587
ID 651	0.66042	-7.2539
ID 652	-1.6378	-0.75265
ID 653	2.8892	-5.9211
ID 654	-2.6404	-11.956
ID 655	2.9273	2.532
ID 656	2.9337	7.6644
ID 657	-5.9794	-8.1969
ID 658	-4.4881	-8.6968
ID 659	0.80884	1.5907
ID 660	-1.4362	-11.052
ID 661	1.2037	-4.491
ID 662	7.9053	2.3784
ID 663	-4.2936	9.2312
ID 664	-16.83	-4.1569
ID 665	0.42747	-4.5559
ID 666	13.391	-10.697
ID 667	9.6708	-4.7629
ID 668	4.9179	-9.8874
ID 669	18.788	-5.7178
ID 670	4.2555	-4.6314
ID 671	-6.1341	-14.842
ID 672	-3.7753	-5.8134
ID 673	4.0001	-5.6543
ID 674	10.741	-2.6541
ID 675	-15.939	-6.4392
ID 676	0.82893	-3.7012
ID 677	7.4914	1.4629
ID 678	-6.3302	-1.7717
ID 679	3.5092	-3.4878
ID 680	4.7975	-5.0641
ID 681	-8.9283	-6.1318
ID 682	8.6452	-2.1394
ID 683	5.6298	-3.194
ID 684	-3.5416	-2.7227
ID 685	1.974	-6.7986
ID 686	4.1116	-2.5897
ID 687	2.6752	5.1008

[truncated: 11 more sheets: Figure 6d, Figure 7a, Figure7b, Figure 7c, S2_Figa, S2_Figb, S3_Fig, S4_Fig, S5_Fig, S6_Fig, S7_Fig]
