# Supplementary material for: Harmonization of resting-state functional MRI data across multiple imaging sites via the separation of site differences into sampling bias and measurement bias
Source: PLoS Biol. 2019 Apr 18;17(4):e3000042. doi: 10.1371/journal.pbio.3000042 (PMC6472734; doi:10.1371/journal.pbio.3000042)
Supplement: S3 Table — SCZ, schizophrenia. (XLSX) [file pbio.3000042.s018.xlsx]

## Sheet: Sheet1
S3 Table. Demographic characteristics of patients in the independent validation cohort dataset for SCZ prediction.
Site	HC			SCZ			ALL
	Number	Male /Female	Age (y)	Number	Male /Female	Age (y)	Number	Male /Female	Age (y)
KTT	77	50/27	28.8±8.98	56	29/27	37.8±9.42	133	79/54	32.6±10.2
KTT: Kyoto University (Trio scanner); HC: healthy control; SCZ: schizophrenia
