# Supplementary material for: Harmonization of resting-state functional MRI data across multiple imaging sites via the separation of site differences into sampling bias and measurement bias
Source: PLoS Biol. 2019 Apr 18;17(4):e3000042. doi: 10.1371/journal.pbio.3000042 (PMC6472734; doi:10.1371/journal.pbio.3000042)
Supplement: S8 Table — MDD, major depressive disorder. (XLSX) [file pbio.3000042.s023.xlsx]

## Sheet: Sheet1
S8 Table. Results of MDD prediction.
Training dataset		Matthews correlation coefficient (MCC)	Diagnostic odds ratio (DOR)	F-value	Area under the curve (AUC)	Accuracy	Precision	Sensitivity	Specificity
	Traveling-subject	0.1	-	0.07	0.74	0.7	0.04	0.65	0.7
	ComBat	0.12	-	0.07	0.78	0.7	0.04	0.72	0.7
	GLM	0.01	-	0.02	0.53	0.79	0.01	0.24	0.8
	Adjusted GLM	0.03	-	0.04	0.61	0.56	0.02	0.57	0.56
	Raw	0.12	-	0.07	0.77	0.72	0.04	0.69	0.72
Independent cohort		Matthews correlation coefficient (MCC)	Diagnostic odds ratio (DOR)	F-value	Area under the curve (AUC)	Accuracy	Precision	Sensitivity	Specificity
	Traveling-subject	0.35	5.09	0.61	0.73	0.65	0.5	0.8	0.57
	ComBat	0.38	6.21	0.63	0.75	0.65	0.5	0.83	0.56
	GLM	0.15	2.24	0.31	0.71	0.65	0.51	0.23	0.88
	Adjusted GLM	NA	NA	NA	0.63	0.65	NA	0	1
	Raw	0.27	3.15	0.55	0.72	0.65	0.5	0.61	0.66
	MDD: major depressive disorder; GLM: general linear model
	TP: true positive, TN: true negative, FP: false positive, FN: false negative
